# Supplementary figures and images for: Pharmacological reduction of NEFA restores the efficacy of incretin-based therapies through GLP-1 receptor signalling in the beta cell in mouse models of diabetes
Source: PubMed Central journal article supplement — Diabetologia. 2012 Nov 28;56(2):423–33. doi: 10.1007/s00125-012-2776-x (PMC3536946; doi:10.1007/s00125-012-2776-x), 2012-11-28

## ESM Fig. 2

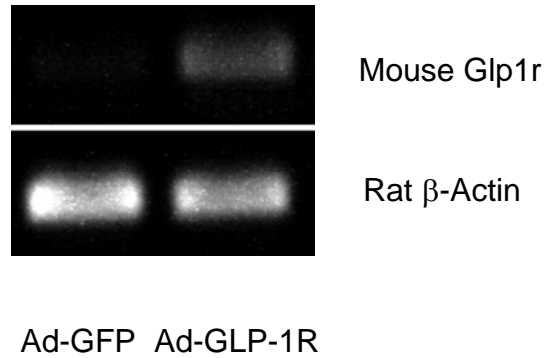

Supplement: 125_2012_2776_MOESM3_ESM.pdf [file 125_2012_2776_MOESM3_ESM.pdf]

# ESM Fig. 5

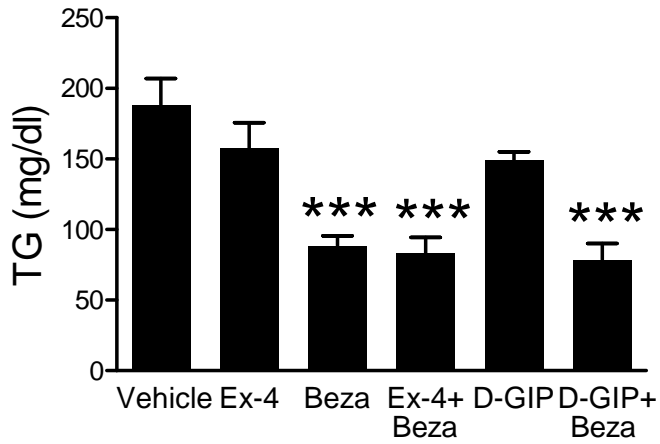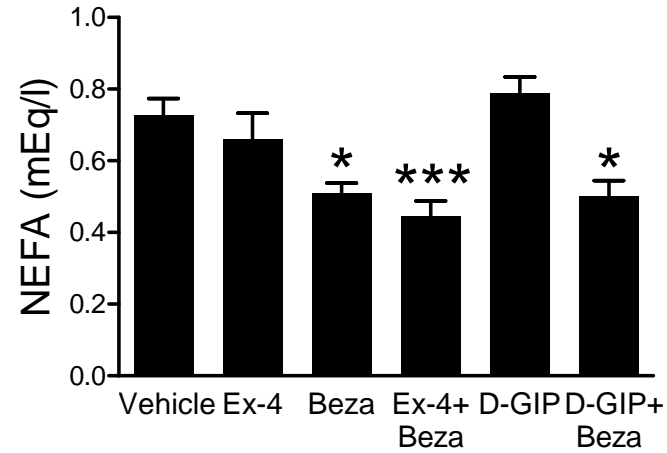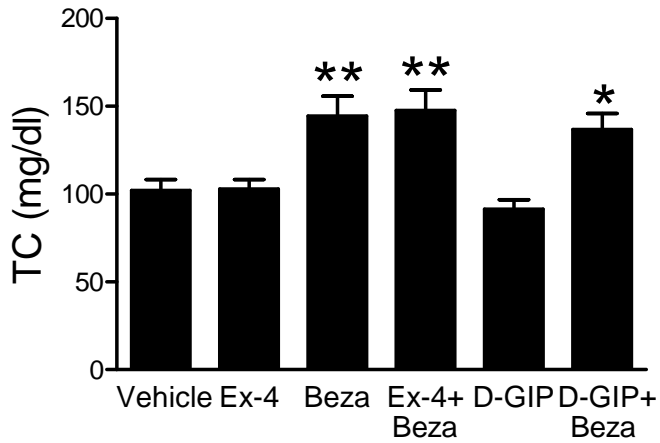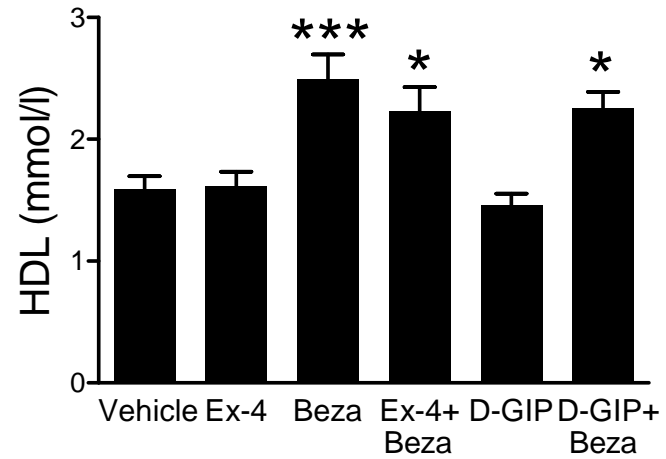

Supplement: 125_2012_2776_MOESM6_ESM.pdf [file 125_2012_2776_MOESM6_ESM.pdf]
