# Supplementary figures and images for: Pharmacological reduction of NEFA restores the efficacy of incretin-based therapies through GLP-1 receptor signalling in the beta cell in mouse models of diabetes
Source: Springer Nature journal article supplement (doi:10.1007/s00125-012-2776-x), 2012-11-28

# ESM Fig. 1

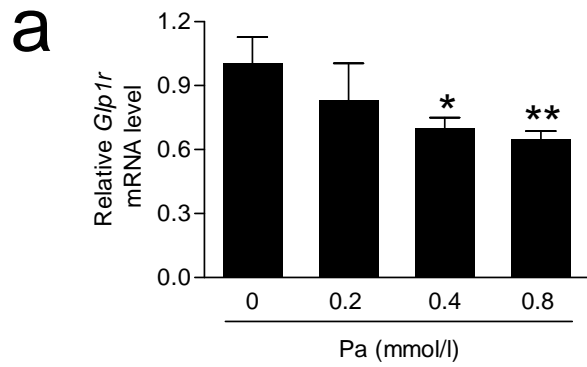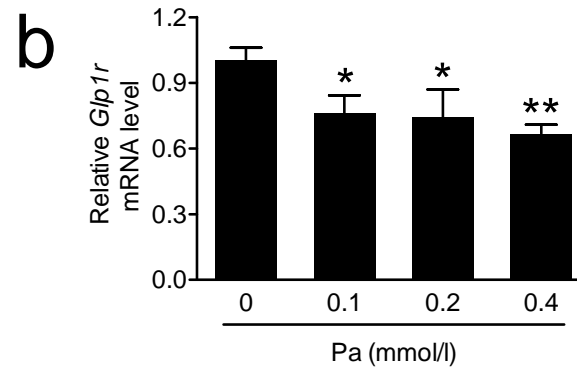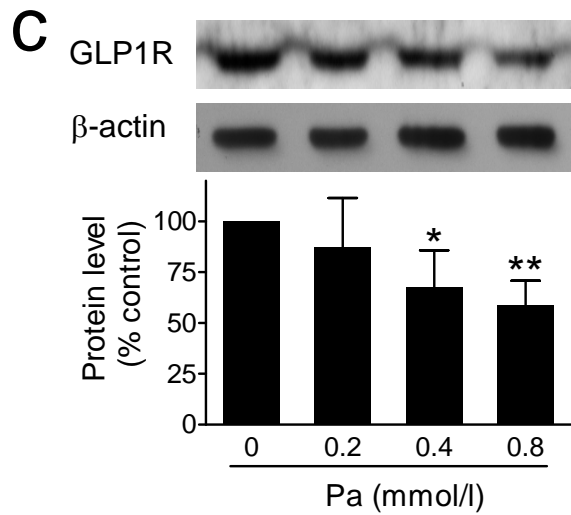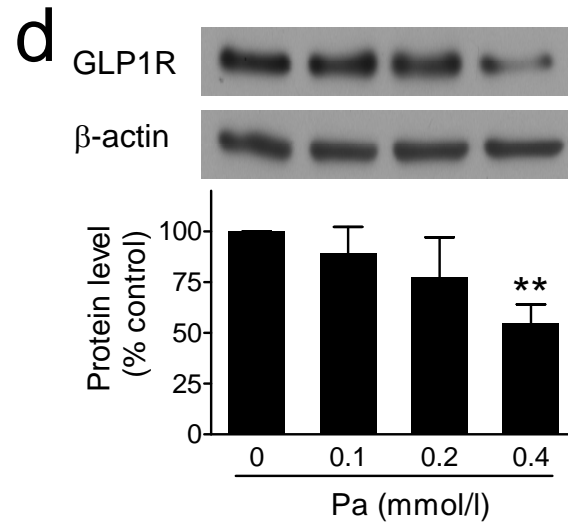

Supplement: MOESM2 [file 8091298]

ESM Fig. 3

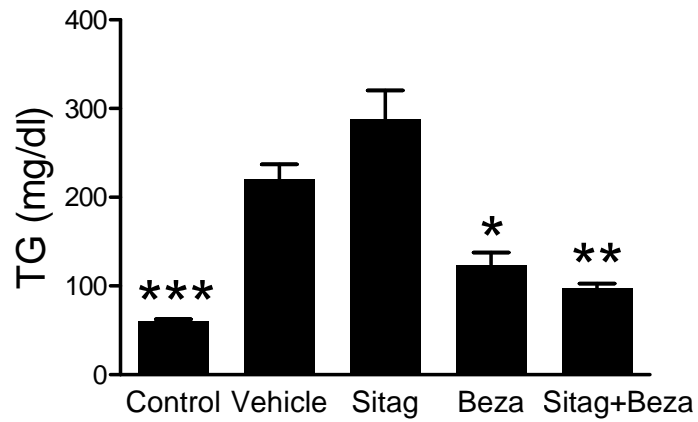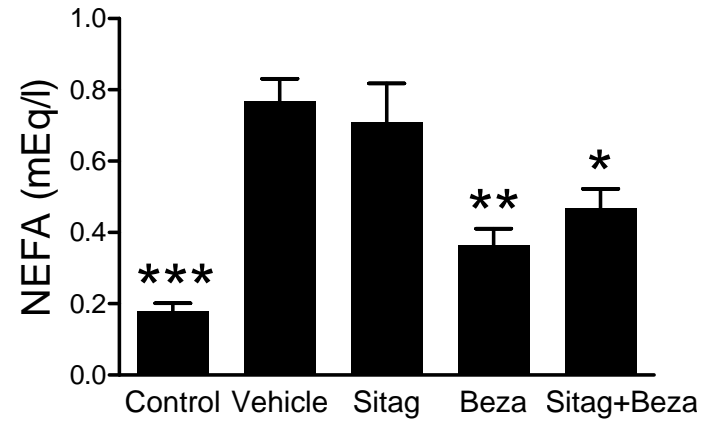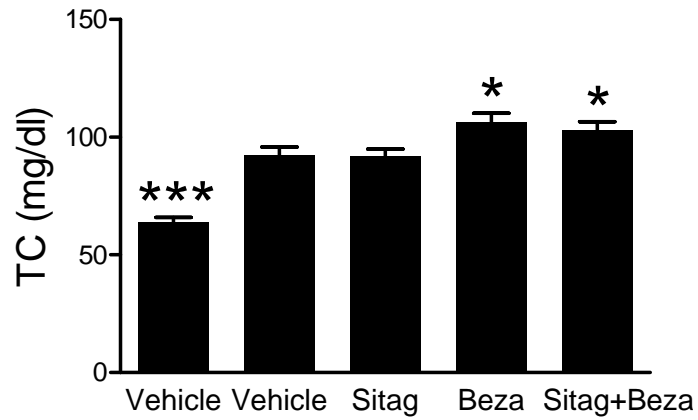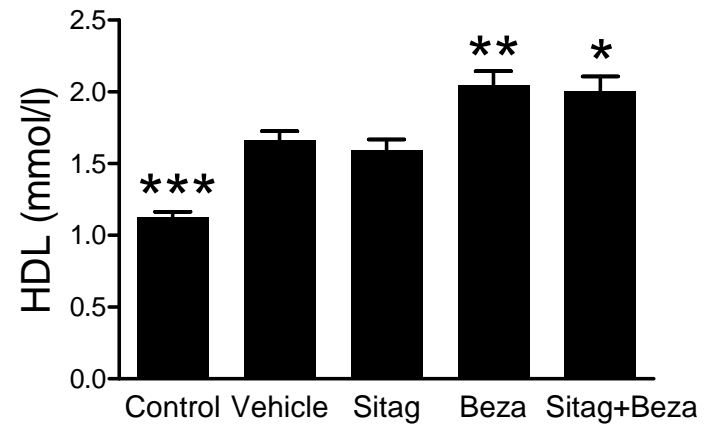

Supplement: MOESM4 [file 8091298]

# ESM Fig. 4

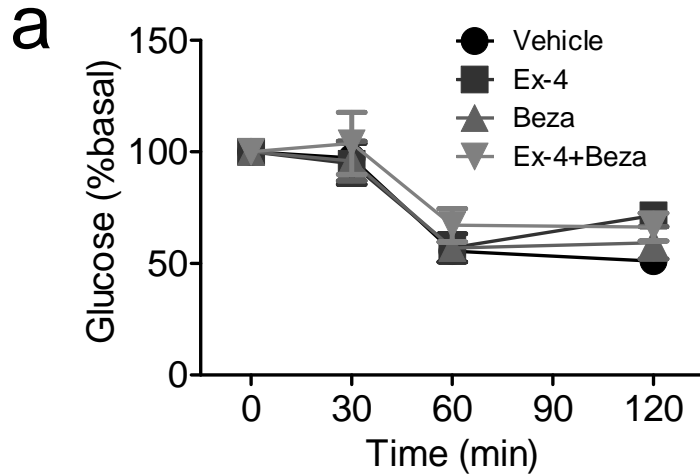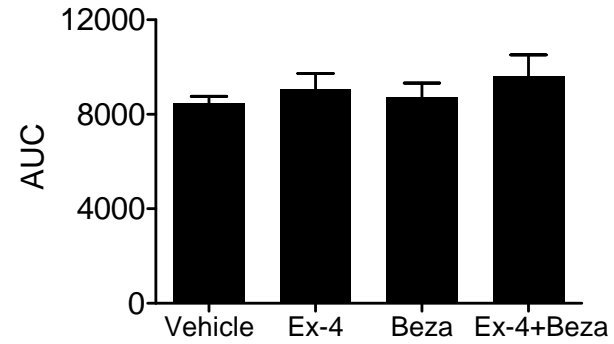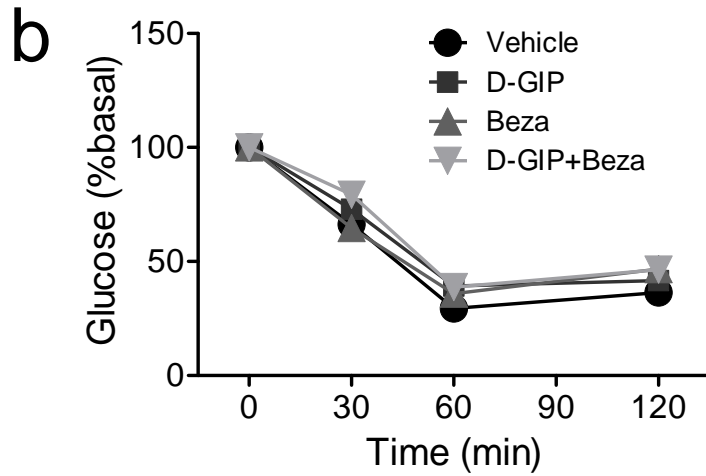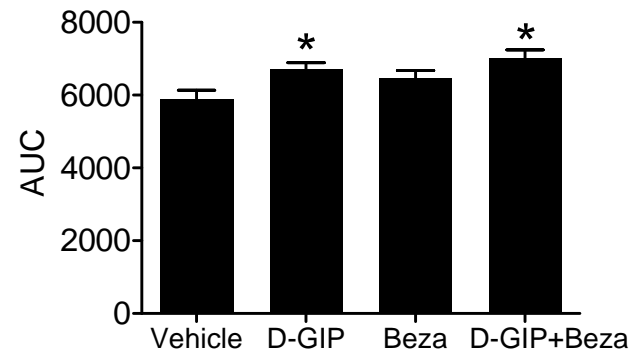

Supplement: MOESM5 [file 8091298]
